# Supplementary material for: CAV1 - GLUT3 signaling is important for cellular energy and can be targeted by Atorvastatin in Non-Small Cell Lung Cancer
Source: PubMed Central journal article supplement (PMC6735519; doi:10.7150/thno.35805), 2019-08-14
Supplement: thnov09p6157s1.pdf [file thnov09p6157s1.pdf]

## CAVI - GLUT3 signaling is important for cellular energy and can be targeted by Atorvastatin in Non-Small Cell Lung Cancer

A Ali et al.

### Supplementary table and figures

| Cell line | Type                         | EGFR status        | Gefitinib sensitivity | Erlotinib sensitivity |
|-----------|------------------------------|--------------------|-----------------------|-----------------------|
| PC-9      | NSCLC                        | delE746-A750       | Yes                   | Yes                   |
| PC-9GR    | NSCLC                        | delE746-A750       | No                    | No                    |
| H1975     | NSCLC                        | L858R, T790M       | No                    | No                    |
| H1703     | NSCLC                        | Wild-type          | No                    | No                    |
| NL20      | Immortalized non transformed | Wild-type          | No                    | No                    |
| HCC4006   | NSCLC                        | delL747-E749,A750P | Yes                   | Yes                   |
| HCC827    | NSCLC                        | delE746-A750       | Yes                   | Yes                   |

**Table S1.** EGFR mutation status and response to EGFR-TKIs, Gefitinib and Erlotinib, of lung cell lines used in this study.

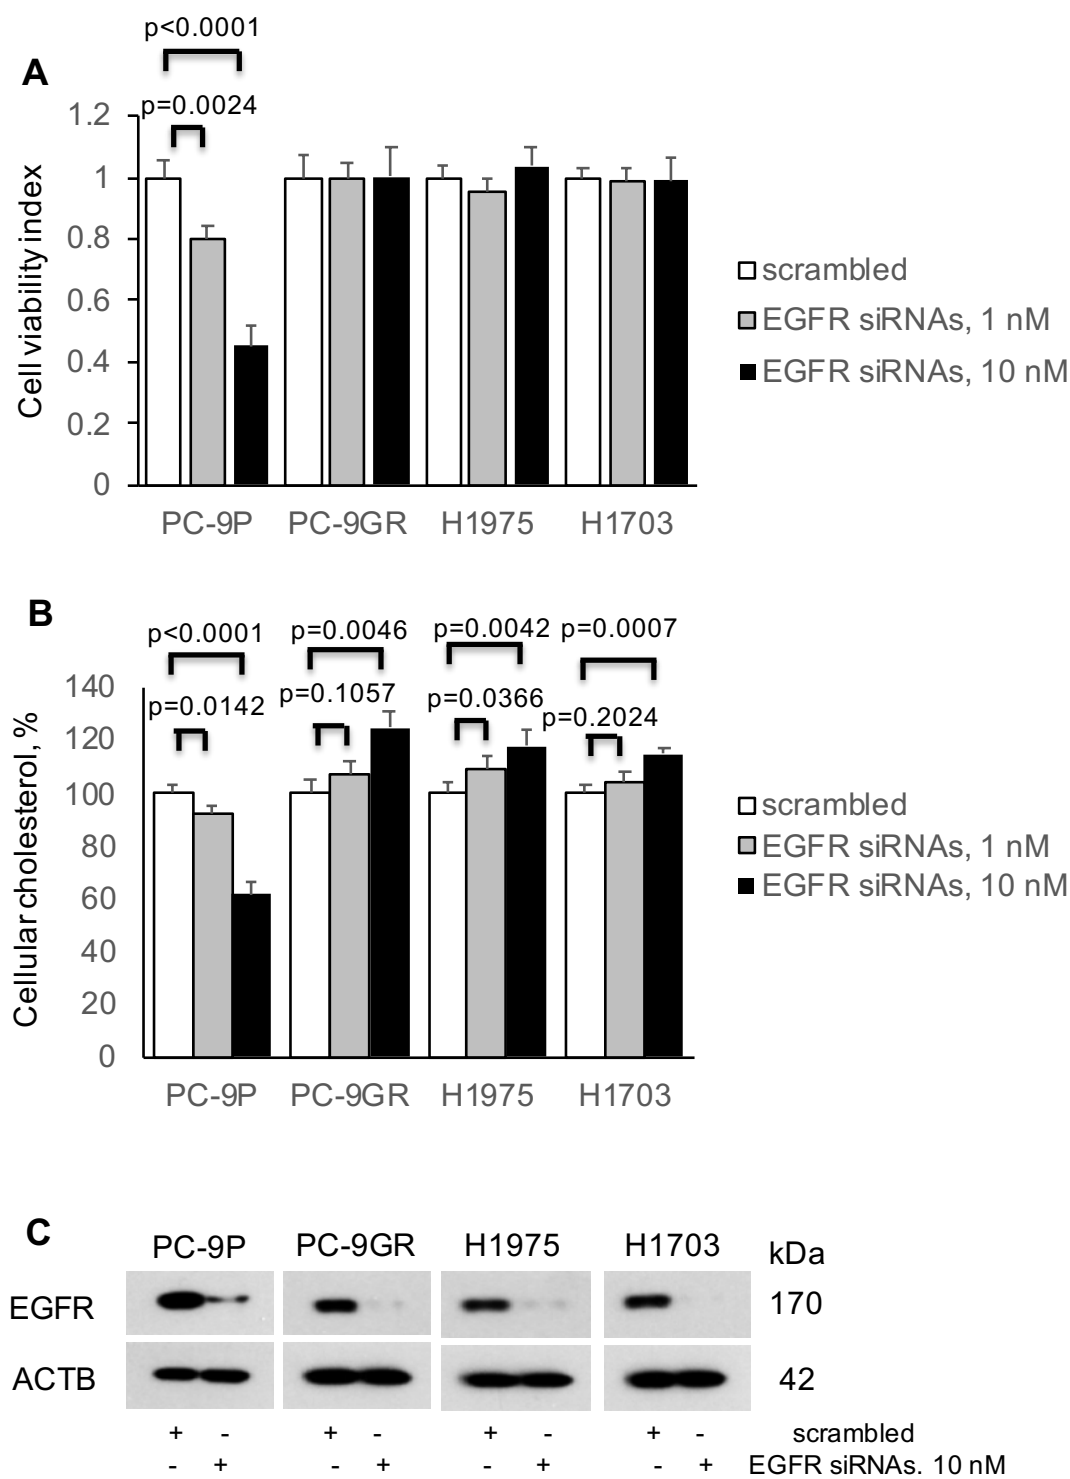

**Figure S1.** The effects of EGFR knockdown by siRNAs on **A.** cell viability and **B.** cellular cholesterol levels in NSCLC cells. Significance in differences in cell viability and cholesterol levels, in which scrambled acted as control, was determined by t-test. **C.** Western blotting show the efficacy of EGFR knockdown with siRNAs at 10 nM for 72 h.

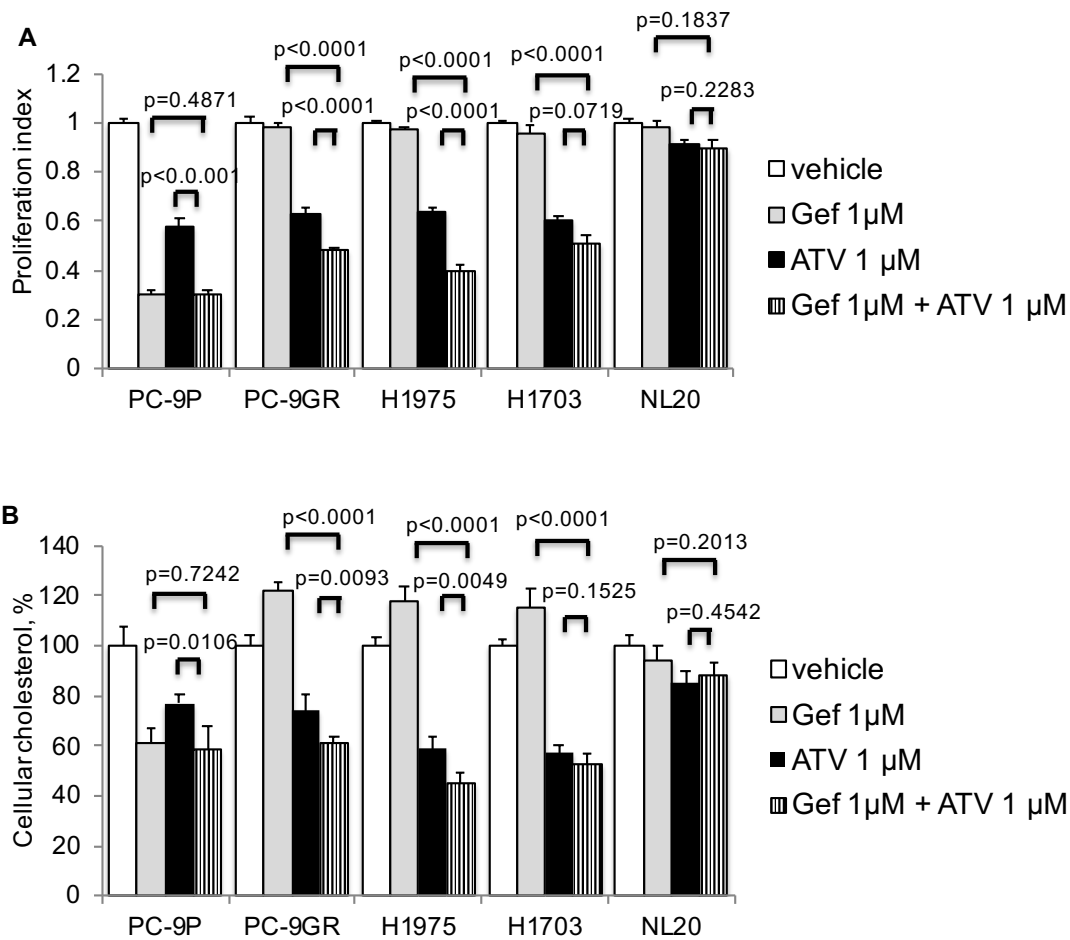

**Figure S2.** The impact of combination ATV and Gefitinib treatment versus single agent on **A.** cell proliferation and **B.** cellular cholesterol levels in NSCLC and NL20 cells. Significance in differences in cell viability and cholesterol levels, in which Gefitinib or ATV acted as controls, was determined by t test.

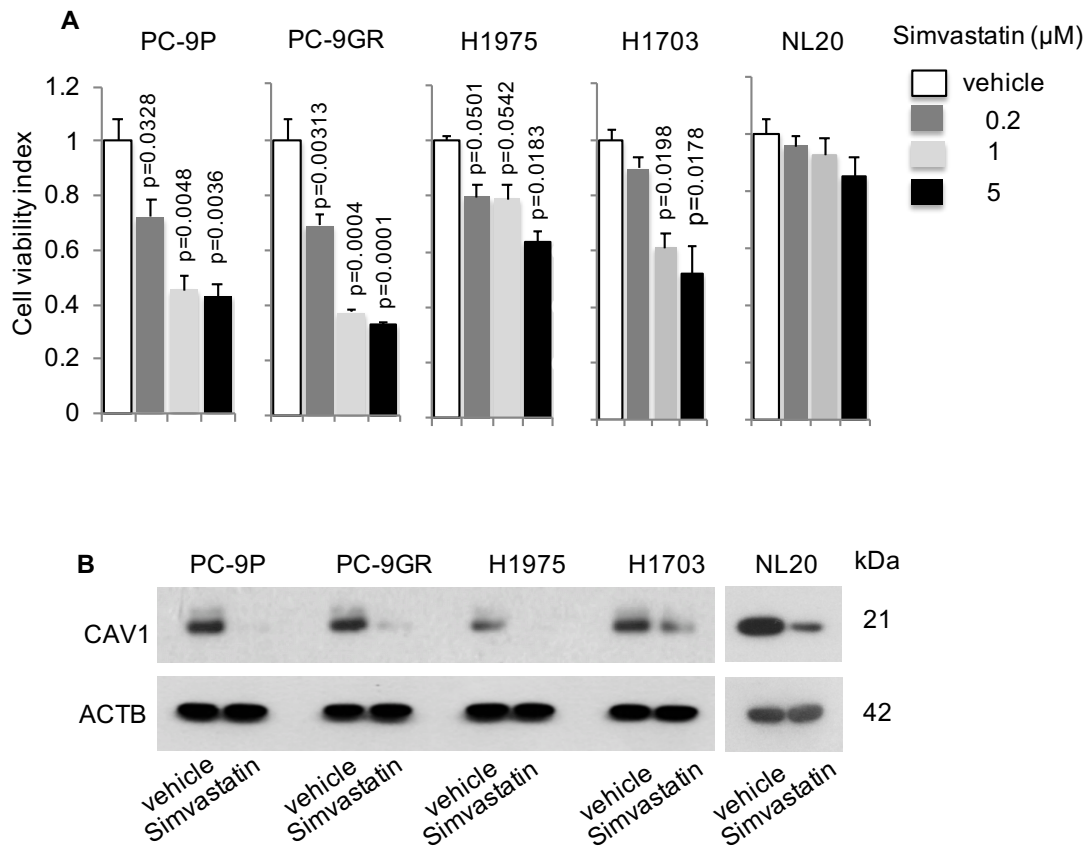

**Figure S3.** Effects of Simvastatin on NSCLC cells. **(A)** Cell viability assay shows the anti-tumor effects of Simvastatin at the indicated doses in NSCLC cells after 72 h exposure. Significance in differences in cell viability indexes, in which vehicle acted as control, was determined by t test. **(B)** Western blot analyses showing Cav1, GLUT3 and Bax protein levels in vehicle- or Simvastatin-treated (at 1 μM) cells.

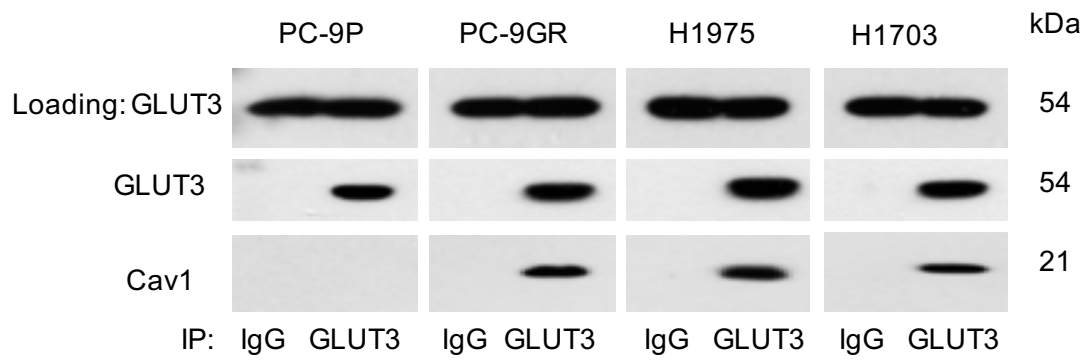

**Figure S4.** GLUT3 immunoprecipitations from tumor cell extracts and levels of GLUT1 and GLUT3 was determined with respective antibodies. Protein size is indicated in kDa.

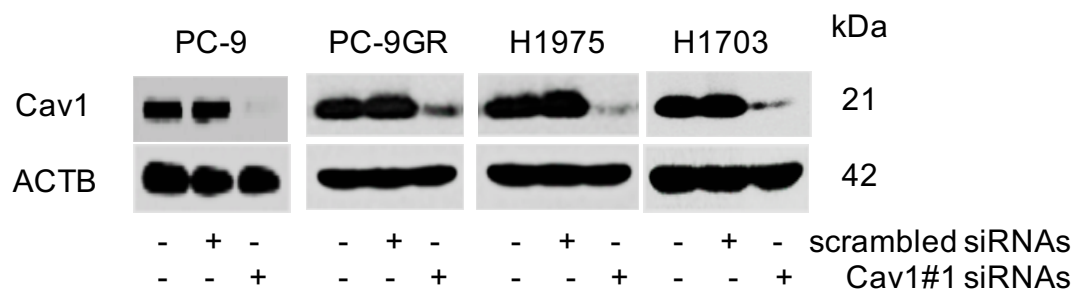

**Figure S5.** Western blots showing Cav1 knockdown, by siRNAs at 25 nM for 72 h, in NSCLC cells.

Protein size is indicated in kDa.

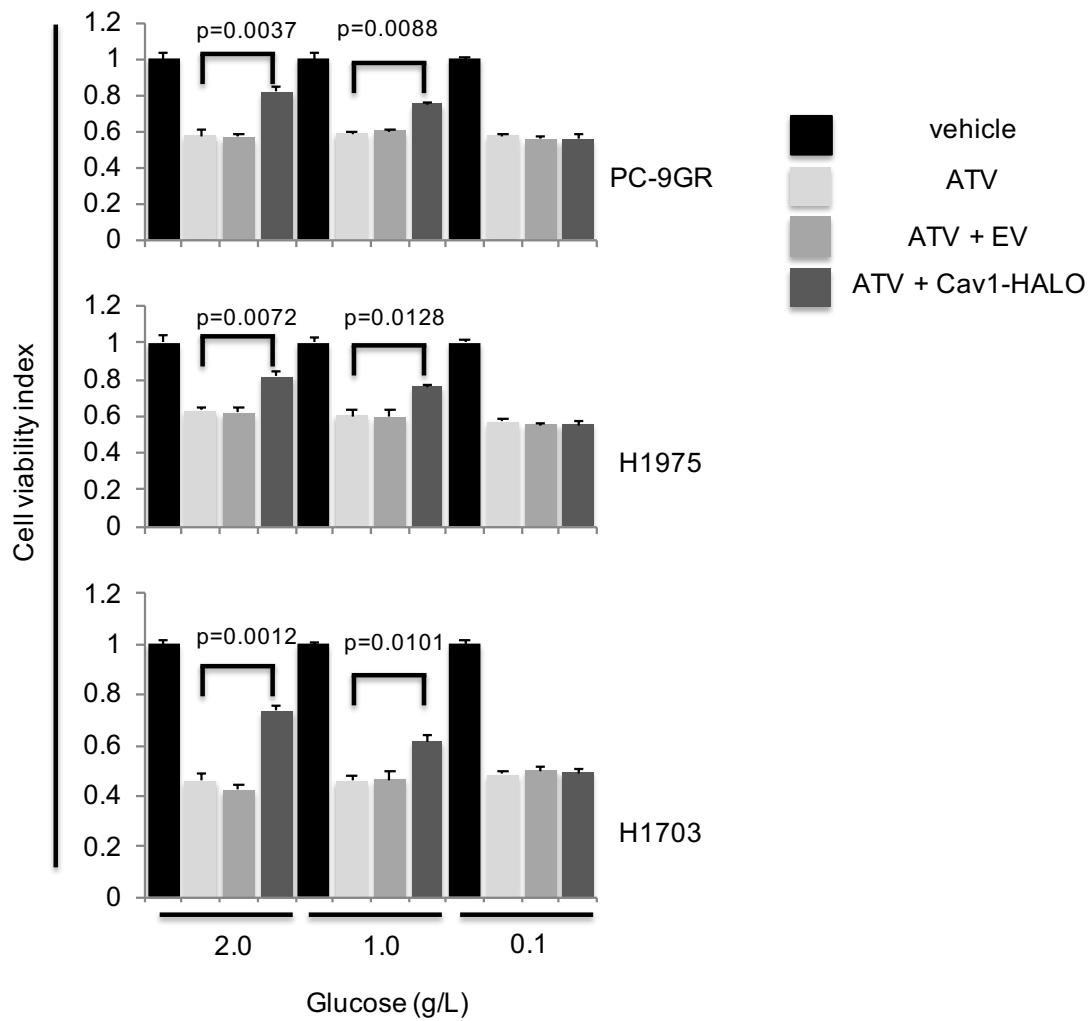

**Figure S6.** The effect of exogenous glucose on viability of ATV- treated or Cav1-HALO expressing ATV-treated (at 1  $\mu$ M) NSCLC cells (n=3). Significance in differences in cell viability indices, in which ATV-treated cells acted as control, was determined by t test.

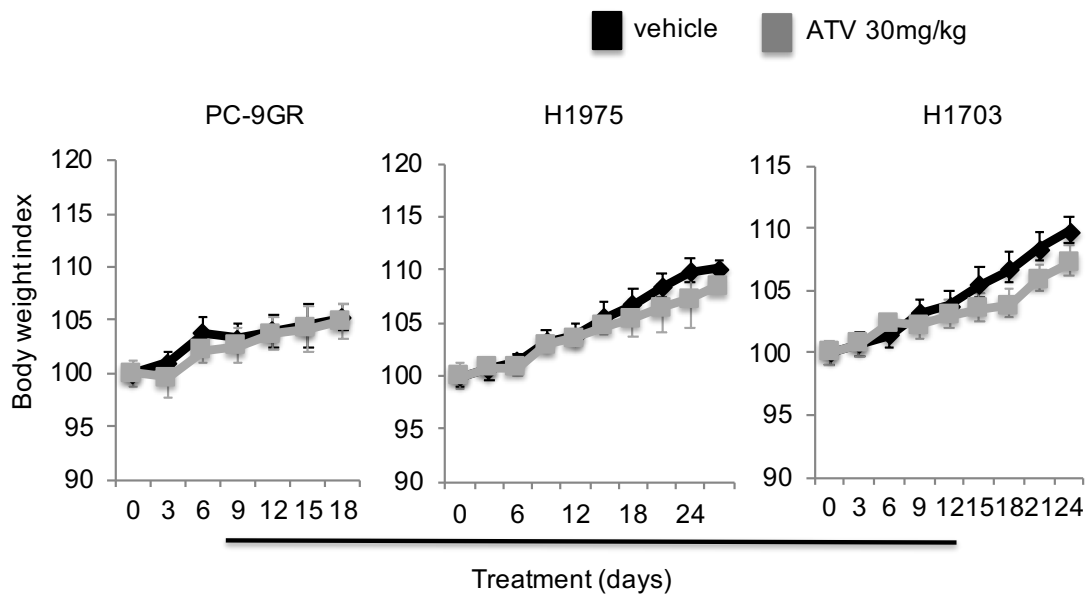

**Figure S7.** Comparison of body weight between vehicle- and ATV-treated mice carrying xenografts of PC-9GR, H1975 and H1703 NSCLC cells. ATV – 30 mg/kg.



| <b>Sample</b>    | <b>Luminescence Ratio B/A</b> | <b>Conclusion</b> |
|------------------|-------------------------------|-------------------|
| Negative control | 0.195                         | negative          |
| Positive control | 92.42                         | positive          |
| PC-9             | 0.297                         | negative          |
| PC-9GR           | 0.422                         | negative          |
| H1975            | 0.223                         | negative          |
| H1703            | 0.169                         | negative          |
| NL20             | 0.141                         | negative          |
| HCC4006          | 0.164                         | negative          |
| HCC827           | 0.378                         | negative          |

| <b>Intepretation of:</b> |  |                   |
|--------------------------|--|-------------------|
| <b>Ratio of B/A</b>      |  |                   |
| <1                       |  | <b>negative</b>   |
| 1-1.2                    |  | <b>borderline</b> |
| >1.2                     |  | <b>positive</b>   |

**Figure S8.** Results and Interpretation of MycoAlertT assay results on lung cells used in this study.

**Centre for Translational Research and Diagnostics**  
Centre for Translational Medicine Level 11  
National University of Singapore  
14 Medical Drive  
Singapore 117599  
Office: +65 65168055, Lab: +65 65165043, Fax: +65 68749664

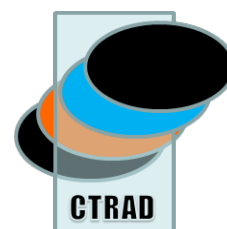

### Cell ID Report

|                |                    |
|----------------|--------------------|
| Prepared by:   | Sarah Low Hong Hui |
| Date Prepared: | 16 October 2013    |

#### 1 Sample Information

|                           |          |
|---------------------------|----------|
| Run Loading Number        | 20       |
| Sample ID                 | Negative |
| Additional ID Comments    | -        |
| Pellet/DNA                | -        |
| Estimated Cells in Pellet | -        |
| Received by               | -        |
| Date Pellet Received      | -        |
| Date DNA Received         | -        |
| DNA vol. ( $\mu$ l)       | -        |
| DNA conc. (ng/ $\mu$ l)   | -        |
| DNA quality (A260/280)    | -        |

DNA Extraction: DNeasy Blood and Tissue Kit (Qiagen, Hilden, Germany)

DNA Analysis: Nanodrop ND1000 (Wilmington, DE)

#### 2 Run Information

|                            |                              |
|----------------------------|------------------------------|
| Volume DNA Used ( $\mu$ l) | -                            |
| Amount DNA Used (ng)       | -                            |
| Run Date                   | 9 <sup>th</sup> October 2013 |
| Run File Name              | Kong_20131009                |

Cell ID Analysis: Cell ID system (Promega, Madison, WI)

Capillary Electrophoresis: ABI 3130xl Genetic Analyser (Life Technologies, Foster City, CA)

### 3 Run Results

| Locus            | Positive          | Negative |
|------------------|-------------------|----------|
| TH01             | 6,9.3             | -        |
| D21S11           | 29,31.2           | -        |
| D5S818           | 12                | -        |
| D13S317          | 9,11              | -        |
| D7S820           | 8,11              | -        |
| D16S539          | 9,13              | -        |
| CSF1PO           | 12                | -        |
| Amelogenin       | X,Y               | -        |
| vWA              | 16,19             | -        |
| TPOX             | 11                | -        |
| Reference        | 2800M control DNA | Negative |
| Reference Source | Promega           | ATCC     |
| Percent Match    | 100%              | 100%     |
| Status           | Passed            | Passed   |

Analysis: Gene mapper V4.0 software. (Life Technologies, Foster City, CA)

Numbers indicate the allele designations for each locus.

Electrophorogram is added below under Appendix for your reference

Percent Match according to ICLAC Match Criteria Worksheet v1.1 (<http://standards.atcc.org>)

### 4 References

ANSI/ATCC ASN-0002-2011. Authentication of Human Cell Lines: Standardization of STR Profiling. ANSI eStandards Store, 2012.

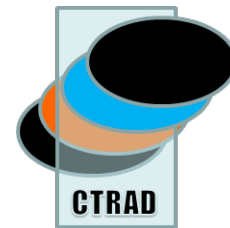

### Cell ID Report

|                |                    |
|----------------|--------------------|
| Prepared by:   | Sarah Low Hong Hui |
| Date Prepared: | 16 October 2013    |

#### 1. Sample Information

|                           |      |
|---------------------------|------|
| Run Loading Number        | 18   |
| Sample ID                 | PC-9 |
| Additional ID Comments    | -    |
| Pellet/DNA                | -    |
| Estimated Cells in Pellet | -    |
| Received by               | -    |
| Date Pellet Received      | -    |
| Date DNA Received         | -    |
| DNA vol. (µl)             | -    |
| DNA conc. (ng/µl)         | -    |
| DNA quality (A260/280)    | -    |

DNA Extraction: DNeasy Blood and Tissue Kit (Qiagen, Hilden, Germany)

DNA Analysis: Nanodrop ND1000 (Wilmington, DE)

#### 2. Run Information

|                      |                              |
|----------------------|------------------------------|
| Volume DNA Used (µl) | -                            |
| Amount DNA Used (ng) | -                            |
| Run Date             | 9 <sup>th</sup> October 2013 |
| Run File Name        | Kong_20131009                |

Cell ID Analysis: Cell ID system (Promega, Madison, WI)

Capillary Electrophoresis: ABI 3130xl Genetic Analyser (Life Technologies, Foster City, CA)

#### 3. Run Results

| Locus      | Positive | PC-9  |
|------------|----------|-------|
| TH01       | 6,9,3    | 7     |
| D21S11     | 29,31.2  | 30    |
| D5S818     | 12       | 11    |
| D13S317    | 9,11     | 8     |
| D7S820     | 8,11     | 10,11 |
| D16S539    | 9,13     | 9     |
| CSF1PO     | 12       | 11    |
| Amelogenin | X,Y      | X     |

|                  |                   |        |
|------------------|-------------------|--------|
| vWA              | 16,19             | 17     |
| TPOX             | 11                | 11     |
|                  |                   |        |
| Reference        | 2800M control DNA | PC-9   |
| Reference Source | Promega           | DSMZ   |
| Percent Match    | 100%              | 100%   |
| Status           | Passed            | Passed |

Analysis: Gene mapper V4.0 software. (Life Technologies, Foster City, CA)

Numbers indicate the allele designations for each locus.

Electrophorogram is added below under Appendix for your reference

Percent Match according to ICLAC Match Criteria Worksheet v1.1 (<http://standards.atcc.org>)

#### 4. References

ANSI/ATCC ASN-0002-2011. Authentication of Human Cell Lines: Standardization of STR Profiling.  
ANSI eStandards Store, 2012.



### Cell ID Report

|                |                    |
|----------------|--------------------|
| Prepared by:   | Sarah Low Hong Hui |
| Date Prepared: | 16 October 2013    |

#### 1. Sample Information

|                           |       |
|---------------------------|-------|
| Run Loading Number        | 11    |
| Sample ID                 | H1975 |
| Additional ID Comments    | -     |
| Pellet/DNA                | -     |
| Estimated Cells in Pellet | -     |
| Received by               | -     |
| Date Pellet Received      | -     |
| Date DNA Received         | -     |
| DNA vol. (µl)             | -     |
| DNA conc. (ng/µl)         | -     |
| DNA quality (A260/280)    | -     |

DNA Extraction: DNeasy Blood and Tissue Kit (Qiagen, Hilden, Germany)

DNA Analysis: Nanodrop ND1000 (Wilmington, DE)

#### 2. Run Information

|                      |                              |
|----------------------|------------------------------|
| Volume DNA Used (µl) | -                            |
| Amount DNA Used (ng) | -                            |
| Run Date             | 9 <sup>th</sup> October 2013 |
| Run File Name        | Kong_20131009                |

Cell ID Analysis: Cell ID system (Promega, Madison, WI)

Capillary Electrophoresis: ABI 3130xl Genetic Analyser (Life Technologies, Foster City, CA)

#### 3. Run Results

| Locus      | Positive | H1975 |
|------------|----------|-------|
| TH01       | 6,9.3    | 7     |
| D21S11     | 29,31.2  | 28    |
| D5S818     | 12       | 11,12 |
| D13S317    | 9,11     | 10,13 |
| D7S820     | 8,11     | 8     |
| D16S539    | 9,13     | 9,12  |
| CSF1PO     | 12       | 12    |
| Amelogenin | X,Y      | X     |

|                  |                   |            |
|------------------|-------------------|------------|
| vWA              | 16,19             | 18         |
| TPOX             | 11                | 8,11       |
|                  |                   |            |
| Reference        | 2800M control DNA | NCI- H1975 |
| Reference Source | Promega           | ATCC       |
| Percent Match    | 100%              | 96.4%      |
| Status           | Passed            | Passed     |

Analysis: Gene mapper V4.0 software. (Life Technologies, Foster City, CA)

Numbers indicate the allele designations for each locus.

Electrophorogram is added below under Appendix for your reference

Percent Match according to ICLAC Match Criteria Worksheet v1.1 (<http://standards.atcc.org>)

#### 4. References

ANSI/ATCC ASN-0002-2011. Authentication of Human Cell Lines: Standardization of STR Profiling.  
ANSI eStandards Store, 2012.



### Cell ID Report

|                |                    |
|----------------|--------------------|
| Prepared by:   | Sarah Low Hong Hui |
| Date Prepared: | 16 October 2013    |

#### 1. Sample Information

|                           |       |
|---------------------------|-------|
| Run Loading Number        | 10    |
| Sample ID                 | H1703 |
| Additional ID Comments    | -     |
| Pellet/DNA                | -     |
| Estimated Cells in Pellet | -     |
| Received by               | -     |
| Date Pellet Received      | -     |
| Date DNA Received         | -     |
| DNA vol. (µl)             | -     |
| DNA conc. (ng/µl)         | -     |
| DNA quality (A260/280)    | -     |

DNA Extraction: DNeasy Blood and Tissue Kit (Qiagen, Hilden, Germany)

DNA Analysis: Nanodrop ND1000 (Wilmington, DE)

#### 2. Run Information

|                      |                              |
|----------------------|------------------------------|
| Volume DNA Used (µl) | -                            |
| Amount DNA Used (ng) | -                            |
| Run Date             | 9 <sup>th</sup> October 2013 |
| Run File Name        | Kong_20131009                |

Cell ID Analysis: Cell ID system (Promega, Madison, WI)

Capillary Electrophoresis: ABI 3130xl Genetic Analyser (Life Technologies, Foster City, CA)

#### 3. Run Results

| Locus      | Positive | H1703 |
|------------|----------|-------|
| TH01       | 6,9,3    | 7     |
| D21S11     | 29,31.2  | 29    |
| D5S818     | 12       | 11    |
| D13S317    | 9,11     | 10    |
| D7S820     | 8,11     | 10,12 |
| D16S539    | 9,13     | 10,12 |
| CSF1PO     | 12       | 12    |
| Amelogenin | X,Y      | X,Y   |



|                  |                   |            |
|------------------|-------------------|------------|
| vWA              | 16,19             | 16,17      |
| TPOX             | 11                | 8,11       |
|                  |                   |            |
| Reference        | 2800M control DNA | NCI- H1703 |
| Reference Source | Promega           | ATCC       |
| Percent Match    | 100%              | 100%       |
| Status           | Passed            | Passed     |

Analysis: Gene mapper V4.0 software. (Life Technologies, Foster City, CA)

Numbers indicate the allele designations for each locus.

Electrophorogram is added below under Appendix for your reference

Percent Match according to ICLAC Match Criteria Worksheet v1.1 (<http://standards.atcc.org>)

#### 4. References

ANSI/ATCC ASN-0002-2011. Authentication of Human Cell Lines: Standardization of STR Profiling.  
ANSI eStandards Store, 2012.



### Cell ID Report

|                |                    |
|----------------|--------------------|
| Prepared by:   | Sarah Low Hong Hui |
| Date Prepared: | 16 October 2013    |

#### 1. Sample Information

|                           |        |
|---------------------------|--------|
| Run Loading Number        | 16     |
| Sample ID                 | HCC827 |
| Additional ID Comments    | -      |
| Pellet/DNA                | -      |
| Estimated Cells in Pellet | -      |
| Received by               | -      |
| Date Pellet Received      | -      |
| Date DNA Received         | -      |
| DNA vol. (µl)             | -      |
| DNA conc. (ng/µl)         | -      |
| DNA quality (A260/280)    | -      |

DNA Extraction: DNeasy Blood and Tissue Kit (Qiagen, Hilden, Germany)  
DNA Analysis: Nanodrop ND1000 (Wilmington, DE)

#### 2. Run Information

|                      |                              |
|----------------------|------------------------------|
| Volume DNA Used (µl) | -                            |
| Amount DNA Used (ng) | -                            |
| Run Date             | 9 <sup>th</sup> October 2013 |
| Run File Name        | Kong_20131009                |

Cell ID Analysis: Cell ID system (Promega, Madison, WI)  
Capillary Electrophoresis: ABI 3130xl Genetic Analyser (Life Technologies, Foster City, CA)

#### 3. Run Results

| Locus      | Positive | HCC827 |
|------------|----------|--------|
| TH01       | 6,9.3    | 6      |
| D21S11     | 29,31.2  | 31     |
| D5S818     | 12       | 12     |
| D13S317    | 9,11     | 9      |
| D7S820     | 8,11     | 11,12  |
| D16S539    | 9,13     | 12     |
| CSF1PO     | 12       | 11     |
| Amelogenin | X,Y      | X      |

|                  |                   |        |
|------------------|-------------------|--------|
| vWA              | 16,19             | 18     |
| TPOX             | 11                | 8      |
|                  |                   |        |
| Reference        | 2800M control DNA | HCC827 |
| Reference Source | Promega           | ATCC   |
| Percent Match    | 100%              | 100%   |
| Status           | Passed            | Passed |

Analysis: Gene mapper V4.0 software. (Life Technologies, Foster City, CA)

Numbers indicate the allele designations for each locus.

Electrophorogram is added below under Appendix for your reference

Percent Match according to ICLAC Match Criteria Worksheet v1.1 (<http://standards.atcc.org>)

#### 4. References

ANSI/ATCC ASN-0002-2011. Authentication of Human Cell Lines: Standardization of STR Profiling. ANSI eStandards Store, 2012.

## Cell Line Authentication Service STR Profile Report

**Sample Submitted By:** Teo Jun Ting

**Email Address:** [teo.jun.ting83@gmail.com](mailto:teo.jun.ting83@gmail.com)

**Order ID:** AITB-CLA 001

**Cell Line Designation:** CRL-2871

**Date Sample Received:** 4th Oct 2017

**Report Date:** 13th Oct 2017

**Methodology:** Ten short tandem repeat (STR) loci plus the gender determining locus, Amelogenin, were amplified using the commercially available GenePrint® 10 System from Promega. The cell line sample was processed using the ABI Prism® 3730xl Genetic Analyzer. Data were analyzed using GeneMapper® 4.1 software (Applied Biosystems). Appropriate positive and negative controls were run and confirmed for each sample submitted. Known reference profiling against the ATCC STR database with the STR profile for your human cell line.

**Data Interpretation:** Cell lines were authenticated using Short Tandem Repeat (STR) analysis as described in 2012 in ANSI Standard (ASN-0002) by the ATCC Standards Development Organization (SDO) and in Capes-Davis et al., Match criteria for human cell line authentication: Where do we draw the line? Int. J. Cancer. 2012 Nov 8. doi: 0.1002/ijc.27931

| Test Results for Submitted Sample                                                                                                                                                                                                                                                    |                        |    |  | ATCC Reference Database Profile |    |  |     |
|--------------------------------------------------------------------------------------------------------------------------------------------------------------------------------------------------------------------------------------------------------------------------------------|------------------------|----|--|---------------------------------|----|--|-----|
| Loci                                                                                                                                                                                                                                                                                 | Query Profile: HCC4006 |    |  | Database Profile: CRL-2871      |    |  |     |
| TH01                                                                                                                                                                                                                                                                                 | 7                      |    |  | 7                               |    |  |     |
| D21S11                                                                                                                                                                                                                                                                               | 31                     |    |  |                                 |    |  |     |
| D5S818                                                                                                                                                                                                                                                                               | 12                     |    |  | 12                              |    |  |     |
| D13S317                                                                                                                                                                                                                                                                              | 11                     | 12 |  | 11                              | 12 |  |     |
| D7S820                                                                                                                                                                                                                                                                               | 9                      | 12 |  | 9                               | 12 |  |     |
| D16S539                                                                                                                                                                                                                                                                              | 11                     | 12 |  | 11                              | 12 |  |     |
| CSF1PO                                                                                                                                                                                                                                                                               | 10                     |    |  | 10                              |    |  |     |
| Amelogenin                                                                                                                                                                                                                                                                           | X                      |    |  | X                               |    |  |     |
| Vwa                                                                                                                                                                                                                                                                                  | 16                     | 17 |  | 16                              | 17 |  |     |
| TPOX                                                                                                                                                                                                                                                                                 | 8                      | 9  |  | 8                               | 9  |  |     |
| Number of shared alleles between query sample and database profile:                                                                                                                                                                                                                  |                        |    |  |                                 |    |  | 14  |
| Total number of alleles in the database profile:                                                                                                                                                                                                                                     |                        |    |  |                                 |    |  | 14  |
| Percent match between in the submitted sample and the database profile:                                                                                                                                                                                                              |                        |    |  |                                 |    |  | 100 |
| The alleles match algorithm compares the 8 core loci plus amelogenin only, even though alleles from all loci will be reported when available.                                                                                                                                        |                        |    |  |                                 |    |  |     |
| <b>NOTE:</b> Loci highlighted in grey (8 core STR loci plus Amelogenin) can be made public to verify cell identity. In order to protect the identity of the donor, please do not publish the allele calls from the STR loci tested. Electropherograms showing raw data are attached. |                        |    |  |                                 |    |  |     |

**Explanation of Test Results**

Cell lines with  $\geq 80\%$  match are considered to be related; i.e., derived from a common ancestry.  
Cell lines with between a 55% to 80% match require further profiling for authentication of relatedness.

- The submitted sample profile is human, but not a match for any profile in the ATCC STR database
- The submitted sample is an exact match for the following ATCC human cell line(s) in the ATCC STR database (8 core loci plus Amelogenin): CRL-2871
- The submitted sample is similar to the following ATCC human cell line(s):

|                                     |                        |
|-------------------------------------|------------------------|
| <b>Performed By Lab Technician:</b> | Jennifer Ng 13/10/2017 |
| <b>Reviewed By:</b>                 | Sathya 13/10/2017      |

**Figure S9.** Authentication of cell lines used in this study.
